# Supplementary material for: The mechanism of ratiometric fluoride sensing and the ESIPT process for 2,6-dibenzothiazolylphenol and its derivative
Source: Royal Society of Chemistry journal article supplement (doi:10.1039/c7qo01076a), 2018-01-01
Supplement: c7qo01076a1.pdf [file c7qo01076a1.pdf]

Electronic Supplementary Information (ESI)

**The mechanism of ratiometric fluoride sensor and ESIPT  
process for 2,6-dibenzothiazolyphenol and its derivative**

Hao Dong, Jinfeng Zhao, Huan Yang, Yujun Zheng\*

School of Physics, Shandong University, Jinan 250100, China

*E-mail address: yzheng@sdu.edu.cn*

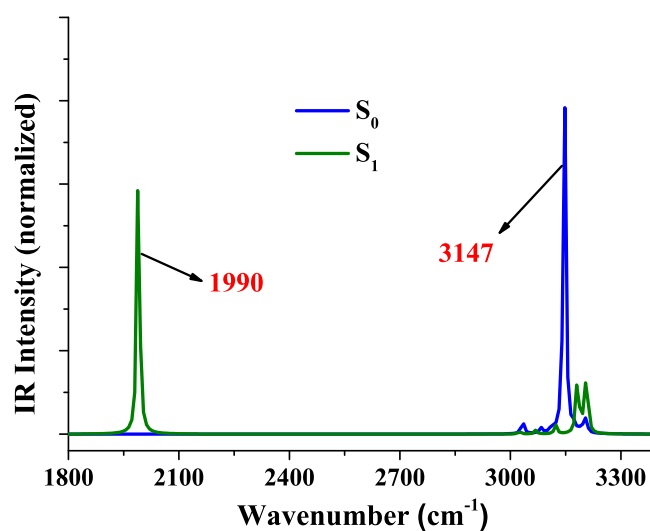

Figure S1: The theoretical IR spectra of 26DB in the spectra region of O1-H2 stretching vibrational mode in both S<sub>0</sub> and S<sub>1</sub> states.

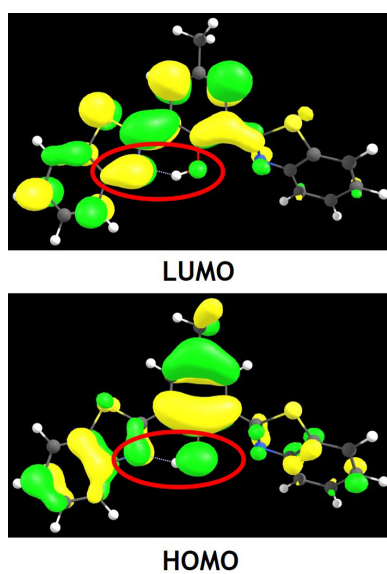

Figure S2: View of the frontier molecule orbitals (HOMO and LUMO) for 26DB molecule. Herein, the red cycle indicates the charge transfer moiety involved in hydrogen bond (O1-H2  $\cdots$  N3) of 26DB.

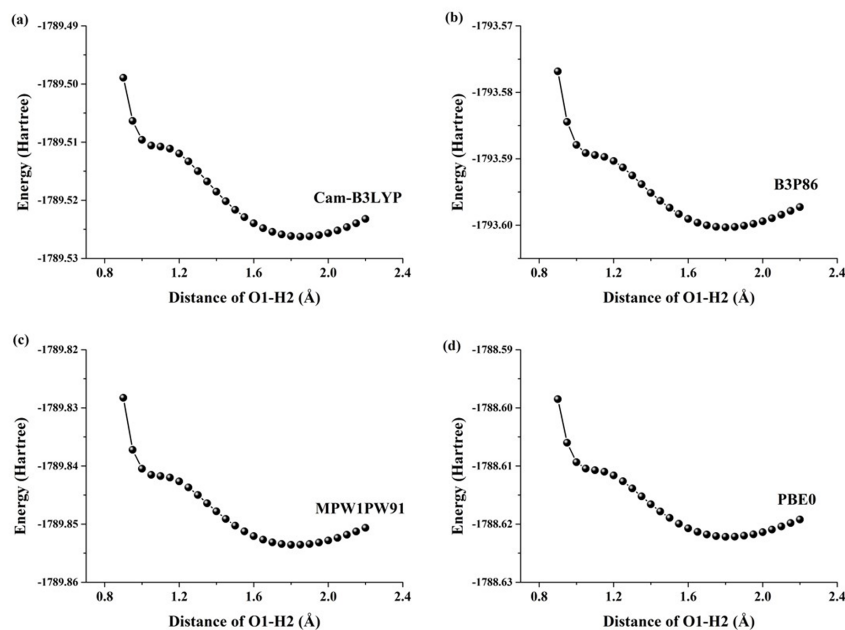

Figure S3: The theoretical  $S_1$ -state potential energy curves for 26DB system in step of 0.05 Å based on four kinds of functionals. (a) Cam-B3LYP; (b) B3P86; (c) MPW1PW91; (d) PBE0.

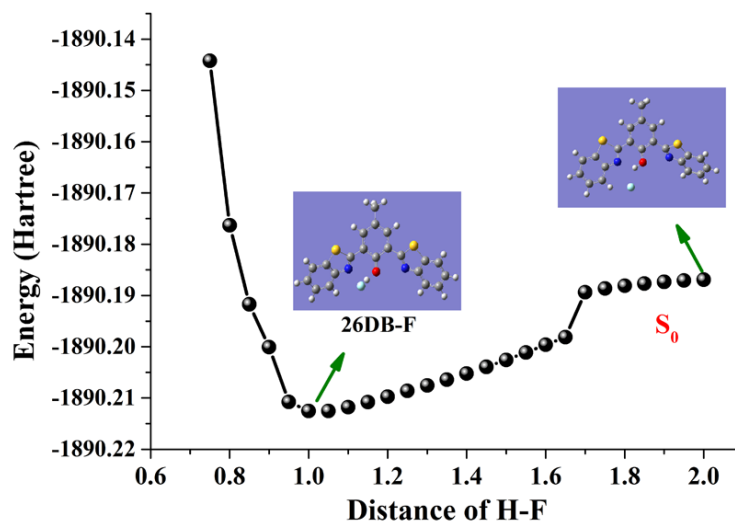

Figure S4: Potential energy curve of  $S_0$  state for 26DB with the addition of fluoride anion, which is the function of H-F distance.

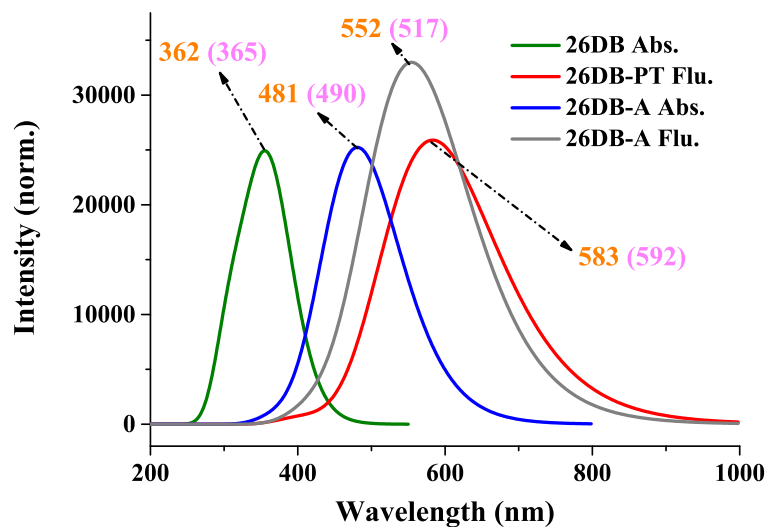

Figure S5: The theoretical electronic spectra of 26DB, 26DB-PT and 26DB-A structures in THF solvent. Herein, the previous experimental results are listed in the brackets.

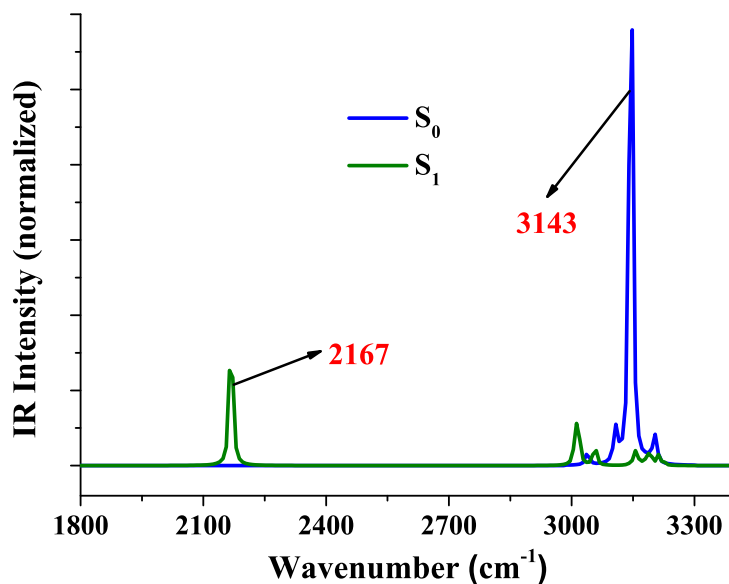

Figure S6: The theoretical IR spectra of Bis-26DB in the spectra region of synergetic O1-H2 and O4-H5 stretching vibrational mode in both  $S_0$  and  $S_1$  states.
